# Supplementary material for: RNA Profiles of the Korat Chicken Breast Muscle with Increased Carnosine Content Produced through Dietary Supplementation with β-Alanine or L-Histidine
Source: MDPI journal article supplement (doi:10.3390/ani11092596), 2021-09-03
Supplement: s1 [file s1]

Table S2. List of primer sequences for quantitative PCR.

| Gene <sup>1</sup> | Primer sequence (5'-3')  | Product size (bp) | GenBank accession number |
|-------------------|--------------------------|-------------------|--------------------------|
| <i>FOXO1</i>      | F: ACAGTTGGGTGTCAGGCTAGG | 139               | NM_204328.1              |
|                   | R: ATGCGCACAGCTTTGTCAAGA |                   |                          |
| <i>IGF2BP3</i>    | F: TCCTGCAGTGAGTGTTGCCT  | 103               | NM_001006359             |
|                   | R: TGCCAAGGCTGGGATGAACA  |                   |                          |
| <i>PDE10A</i>     | F: AAGATCTCGCAAGCCACACG  | 72                | XM_004935554.3           |
|                   | R: TGCATCCATGAGCCCCTTCTC |                   |                          |
| <i>GRIP2</i>      | F: ACACGGTGGAAGTGAAGCGA  | 139               | XM_040646724.1           |
|                   | R: TCACCGATGTGGATGGCTCC  |                   |                          |
| <i>PPM1K</i>      | F: GCCCTGCTGTGTCGAAAAGG  | 164               | XM_420574.6              |
|                   | R: CCTATGCTCCGCGTCATTGC  |                   |                          |
| <i>ACBT</i>       | F: TGACCGCGTTACTCCCACAG  | 90                | NM_205518.1              |
|                   | R: CGAAACCGGCCTTGACATA   |                   |                          |

<sup>1</sup> Gene abbreviation represents forkhead box O1 (*FOXO1*), insulin-like growth factor 2 mRNA binding protein 3 (*IGF2BP3*), phosphodiesterase 10A (*PDE10A*), glutamate receptor interacting protein 2 (*GRIP2*), and protein phosphatase Mg<sup>2+</sup>/Mn<sup>2+</sup> dependent 1K (*PPM1K*), respectively.
