# Supplementary material for: RNA Profiles of the Korat Chicken Breast Muscle with Increased Carnosine Content Produced through Dietary Supplementation with β-Alanine or L-Histidine
Source: MDPI journal article supplement (doi:10.3390/ani11092596), 2021-09-03
Supplement: s1 [file s1]

Table S1. Composition of the experimental diet.

| Treatment group <sup>1</sup>      | Grower (22 to 42 days) |       |       | Finisher (43 to 70 days) |       |       |
|-----------------------------------|------------------------|-------|-------|--------------------------|-------|-------|
|                                   | A                      | B     | C     | A                        | B     | C     |
| <u>Ingredients (g/100 g)</u>      |                        |       |       |                          |       |       |
| Corn                              | 59.4                   | 57.52 | 58.3  | 67.3                     | 65.14 | 66.14 |
| Soybean meal (44% CP)             | 30.8                   | 28.4  | 28.22 | 26.3                     | 26.7  | 26.5  |
| Full fat soybean                  | 2.42                   | 5.5   | 5.8   | 0                        | 0     | 0     |
| Rice bran oil                     | 4                      | 4.2   | 3.8   | 3.04                     | 3.8   | 3.5   |
| L-Lysine                          | 0.18                   | 0.18  | 0.18  | 0.19                     | 0.19  | 0.19  |
| DL-Methionine                     | 0.21                   | 0.21  | 0.21  | 0.14                     | 0.14  | 0.14  |
| Salt                              | 0.35                   | 0.35  | 0.35  | 0.35                     | 0.35  | 0.35  |
| Calcium carbonate                 | 1.42                   | 1.42  | 1.42  | 1.2                      | 1.2   | 1.2   |
| MDCP (P21)                        | 1.02                   | 1.02  | 1.02  | 1.28                     | 1.28  | 1.28  |
| Premix <sup>2</sup>               | 0.2                    | 0.2   | 0.2   | 0.2                      | 0.2   | 0.2   |
| β-Alanine                         | 0                      | 1     | 0     | 0                        | 1     | 0     |
| L-Histidine                       | 0                      | 0     | 0.5   | 0                        | 0     | 0.5   |
| <u>Calculated composition (%)</u> |                        |       |       |                          |       |       |
| ME (kcal/kg)                      | 3,113                  | 3,116 | 3,112 | 3,112                    | 3,116 | 3,118 |
| Crude protein, %                  | 19.39                  | 19.30 | 19.39 | 17.08                    | 17.10 | 17.08 |
| Crude fiber, %                    | 3.6                    | 3.56  | 3.58  | 3.32                     | 3.3   | 3.31  |
| Ether extract, %                  | 6.94                   | 7.6   | 7.29  | 5.81                     | 6.49  | 6.23  |
| Calcium, %                        | 0.9                    | 0.9   | 0.9   | 0.86                     | 0.86  | 0.86  |
| Total phosphorus, %               | 0.57                   | 0.57  | 0.57  | 0.6                      | 0.59  | 0.59  |
| Histidine                         | 0.45                   | 0.48  | 0.99  | 0.37                     | 0.37  | 0.87  |

<sup>1</sup> Treatment groups are A (without supplementation), B (supplemented with 1% alanine), and C (supplemented with 0.5% L-histidine), respectively.

<sup>2</sup> Premix (0.5%) provided the following per kilogram of diet: 15,000 IU of vitamin A; 3000 IU of vitamin D3; 25 IU of vitamin E; 5 mg of vitamin K3; 2 mg of vitamin B1; 7 mg of vitamin B2; 4 mg of vitamin B6; 25 ug of vitamin B12; 11.04 mg of pantothenic acid; 35 mg of nicotinic acid; 1 mg of folic acid; 15 ug of biotin; 250 mg of choline chloride; 1.6 mg of Cu; 60 mg of Mn; 45 mg of Zn; 80 mg of Fe; 0.4 mg of I; 0.15 mg of Se.
